# Supplementary material for: Cost-effectiveness of Axicabtagene Ciloleucel and Tisagenlecleucel as Second-line or Later Therapy in Relapsed or Refractory Diffuse Large B-Cell Lymphoma
Source: PubMed Central journal article supplement (PMC9856352; doi:10.1001/jamanetworkopen.2022.45956), 2022-12-15
Supplement: jamanetwopen-e2245956-s002.pdf [file jamanetwopen-e2245956-s002.pdf]

## Data Sharing Statement

Choe. Cost-Effectiveness of Axicabtagene Ciloleucel and Tisagenlecleucel as Second-Line or Later Therapy in Relapsed or Refractory Diffuse Large B-Cell Lymphoma. *JAMA Netw Open*. Published December 15, 2022. doi:10.1001/jamanetworkopen.2022.45956

### Data

**Data available:** Yes

**Data types:** Data (not involving human participants)

**How to access data:** JHC and MA had full access to all the data in the study and take responsibility for the integrity of the data and the accuracy of the data analysis. Emails:

[Mohamed.Abouelenein@med.usc.edu](mailto:Mohamed.Abouelenein@med.usc.edu) and [jhchoe@usc.edu](mailto:jhchoe@usc.edu)

**When available:** With publication

### Supporting Documents

**Document types:** None

### Additional Information

**Who can access the data:** Researchers whose proposed use of the data has been approved

**Types of analyses:** Cost-effectiveness analysis

**Mechanisms of data availability:** After approval of a proposal
